# Supplementary material
Source: PubMed Central journal article supplement (PMC2577390)
Supplement: NIHMS62947-supplement-1si20060728_06.pdf [file NIHMS62947-supplement-1si20060728_06.pdf]

**SUPPLEMENTARY MATERIAL**

**QUANTITATIVE PROTEOMIC AND MICROARRAY ANALYSIS OF THE  
ARCHAEON *METHANOSARCINA ACETIVORANS* GROWN WITH ACETATE  
VERSUS METHANOL\***

**Lingyun Li<sup>‡,§</sup>, Qingbo Li<sup>¶,§,||</sup>, Lars Rohlin<sup>†,§</sup>, UnMi Kim<sup>†</sup>, Kirsty Salmon<sup>†</sup>, Tomas Rejtar<sup>‡</sup>,  
Robert P. Gunsalus<sup>†</sup>, Barry L. Karger<sup>‡</sup>, and James G. Ferry<sup>¶,#</sup>**

Table S1. Proteins with at least 3-fold, and transcripts with at least 2.5-fold, differential abundance, in acetate- *versus* methanol-grown *M. acetivorans*.

| Loci   | Annotation <sup>a</sup>                                         | Proteome        |                      | Transcriptome<br>(Me/Ac) <sup>b,d</sup> |
|--------|-----------------------------------------------------------------|-----------------|----------------------|-----------------------------------------|
|        |                                                                 | No. of peptides | (Me/Ac) <sup>b</sup> |                                         |
| MA0007 | conserved hypothetical protein                                  |                 | ND                   | 0.36                                    |
| MA0010 | formyl-methanofuran:tetrahydromethanopterin N-formyltransferase | 10              | 23 ± 4               | 10.71                                   |
| MA0023 | zinc ABC transporter, solute-binding lipoprotein                | 5               | 40 ± 10              | ND                                      |
| MA0028 | predicted protein                                               |                 | ND                   | 0.25                                    |
| MA0032 | pyruvate synthase, subunit alpha                                |                 | ND                   | 3.03                                    |
| MA0033 | pyruvate synthase, subunit delta                                | 2               | 3.0 ± 0.1            | 5.06                                    |
| MA0034 | pyruvate synthase, subunit gamma                                |                 | ND                   | 4.54                                    |
| MA0036 | signal sequence peptidase                                       |                 | ND                   | 2.85                                    |
| MA0038 | predicted protein                                               | 5               | 0.11 ± 0.04          | ND                                      |
| MA0039 | conserved hypothetical protein                                  | 5               | 0.13 ± 0.03          | ND                                      |
| MA0040 | conserved hypothetical protein                                  |                 | ND                   | 3.11                                    |
| MA0045 | predicted protein                                               |                 | ND                   | 0.25                                    |
| MA0046 | predicted protein                                               | 4               | 3.8 ± 0.6            | ND                                      |
| MA0054 | conserved hypothetical protein                                  | 9               | 7.4 ± 0.6            | ND                                      |
| MA0056 | conserved hypothetical protein                                  | 3               | 7 ± 4                | ND                                      |
| MA0057 | conserved hypothetical protein                                  | 3               | 5.6 ± 0.1            | ND                                      |
| MA0072 | anaerobic ribonucleoside-triphosphate reductase                 | 17              | 5.1 ± 0.8            | ND                                      |
| MA0076 | translation initiation factor 2B, subunit 1                     |                 | ND                   | 2.81                                    |
| MA0086 | Hsp60                                                           | 18              | 5 ± 1                | 8.52                                    |
| MA0092 | conserved hypothetical protein                                  |                 | ND                   | 3.60                                    |
| MA0090 | phenylalanyl-tR synthetase, subunit alpha                       | 11              | 6 ± 2                | ND                                      |
| MA0097 | glycyl-tR synthetase                                            | 10              | 6 ± 1                | 3.26                                    |

|        |                                                                                                 |    |                          |      |
|--------|-------------------------------------------------------------------------------------------------|----|--------------------------|------|
| MA0111 | predicted protein                                                                               |    | ND                       | 4.52 |
| MA0118 | histidinol-phosphate aminotransferase                                                           | 8  | 4.1 ± 0.8                | ND   |
| MA0119 | acetylornithine aminotransferase                                                                |    | ND                       | 3.44 |
| MA0123 | predicted protein                                                                               |    | ND                       | 0.32 |
| MA0130 | phosphoribosylformylglycinamide cyclo-ligase                                                    | 7  | 8 ± 4                    | ND   |
| MA0134 | predicted protein                                                                               | 3  | 0.16 ± 0.01              | ND   |
| MA0137 | dCMP deaminase                                                                                  | 2  | 6 ± 3                    | ND   |
| MA0144 | monomethylamine methyltransferase                                                               | 4  | 4.7 ± 0.9                | ND   |
| MA0146 | methylcobalamin:CoM methyltransferase isozyme A                                                 | 3  | 7 ± 1                    | 6.13 |
| MA0152 | predicted protein                                                                               |    | ND                       | 4.61 |
| MA0183 | ribosomal protein L10e                                                                          | 8  | 7 ± 3                    | ND   |
| MA0194 | alanyl-tR synthetase                                                                            |    | ND                       | 2.65 |
| MA0201 | 3-isopropylmalate dehydrogenase                                                                 |    | ND                       | 4.60 |
| MA0202 | 3-isopropylmalate dehydratase                                                                   | 7  | 3.6 ± 0.2                | ND   |
| MA0204 | conserved hypothetical protein                                                                  |    | ND                       | 0.31 |
| MA0206 | conserved hypothetical protein                                                                  |    | ND                       | 2.68 |
| MA0208 | pseudouridylate synthase                                                                        |    | ND                       | 0.34 |
| MA0211 | predicted protein                                                                               |    | ND                       | 2.52 |
| MA0215 | predicted protein                                                                               | 3  | 0.12 ± 0.01              | 0.04 |
| MA0217 | ATP phosphoribosyltransferase                                                                   | 7  | 9 ± 3                    | ND   |
| MA0218 | N-(5-phospho-D-ribosylformimino)-5-amino-1-(5-phosphoribosyl)-4-imidazole carboxamide isomerase | 3  | 4.9 ± 0.7                | ND   |
| MA0237 | predicted protein                                                                               |    | ND                       | 0.14 |
| MA0244 | conserved hypothetical protein                                                                  |    | ND                       | 3.66 |
| MA0246 | 4-hydroxybenzoate decarboxylase                                                                 | 7  | 4.1 ± 0.7                | ND   |
| MA0247 | hypothetical protein (multi-domain)                                                             |    | ND                       | 0.08 |
| MA0269 | Methyl-THMPT:CoM methyltransferase (MtrH), subunit H                                            | 10 | 0.31 ± 0.1 <sup>c</sup>  | ND   |
| MA0270 | Methyl-THMPT:CoM methyltransferase (MtrG), subunit G                                            | 2  | 0.3 ± 0.1 <sup>c</sup>   | ND   |
| MA0272 | Methyl-THMPT:CoM methyltransferase (MtrA), subunit A                                            | 5  | 0.3 ± 0.1 <sup>c</sup>   | ND   |
| MA0273 | Methyl-THMPT:CoM methyltransferase (MtrB), subunit B                                            | 3  | 0.20 ± 0.03 <sup>c</sup> | ND   |
| MA0274 | Methyl-THMPT:CoM methyltransferase (MtrC), subunit C                                            | 2  | 0.3 ± 0.1 <sup>c</sup>   | ND   |
| MA0275 | Methyl-THMPT:CoM methyltransferase (MtrD), subunit D                                            | 2  | 0.2 ± 0.05 <sup>c</sup>  | ND   |
| MA0276 | Methyl-THMPT:CoM methyltransferase (MtrE), subunit E                                            |    | ND                       | 0.25 |
| MA0284 | hypothetical protein (multi-domain)                                                             |    | ND                       | 3.84 |
| MA0285 | hypothetical protein (multi-domain)                                                             |    | ND                       | 3.87 |
| MA0302 | oligopeptide ABC transporter, solute-binding protein                                            | 3  | 7 ± 1                    | ND   |
| MA0336 | cell surface protein                                                                            |    | ND                       | 6.14 |
| MA0337 | conserved hypothetical protein                                                                  |    | ND                       | 0.26 |
| MA0339 | conserved hypothetical protein                                                                  | 3  | 3.1 ± 0                  | ND   |
| MA0390 | predicted protein                                                                               |    | ND                       | 2.64 |
| MA0435 | predicted protein                                                                               |    | ND                       | 0.16 |
| MA0439 | fructose-bisphosphate aldolase                                                                  | 4  | 3.8 ± 0.4                | ND   |
| MA0440 | dCTP deaminase                                                                                  | 2  | 4 ± 0.2                  | 0.11 |
| MA0464 | predicted protein                                                                               | 2  | 0.02 ± 0.01              | 0.21 |
| MA0477 | predicted protein                                                                               | 4  | 0.2 ± 0.1                | 0.26 |
| MA0487 | predicted protein                                                                               |    | ND                       | 0.14 |
| MA0492 | predicted protein                                                                               |    | ND                       | 3.67 |

|        |                                                             |    |                 |      |
|--------|-------------------------------------------------------------|----|-----------------|------|
| MA0538 | peptidase family protein U32                                |    | ND              | 2.90 |
| MA0539 | predicted protein                                           | 2  | $0.3 \pm 0.1$   | 0.06 |
| MA0571 | predicted protein                                           |    | ND              | 4.83 |
| MA0587 | glutamyl-tR synthetase                                      | 8  | $5 \pm 2$       | ND   |
| MA0595 | ribosomal protein L18e                                      | 5  | $5 \pm 1$       | ND   |
| MA0596 | ribosomal protein L13p                                      | 3  | $6 \pm 2$       | ND   |
| MA0597 | ribosomal protein S9p                                       | 7  | $4.8 \pm 0.5$   | ND   |
| MA0600 | ribosomal protein S2p                                       | 8  | $5 \pm 1$       | 2.78 |
| MA0609 | R -binding protein                                          |    | ND              | 0.33 |
| MA0644 | translation initiation factor 2B, subunit alpha             |    | ND              | 3.23 |
| MA0646 | ribosomal protein L44e                                      | 3  | $4.4 \pm 0.5$   | 8.17 |
| MA0651 | conserved hypothetical protein                              | 7  | $9 \pm 3$       | ND   |
| MA0653 | predicted protein                                           | 11 | $3.8 \pm 0.7$   | ND   |
| MA0656 | 2-5 R ligase                                                |    | ND              | 0.22 |
| MA0669 | replication factor C, small subunit                         | 8  | $6 \pm 2$       | ND   |
| MA0671 | Tungsten formylmethanofuran dehydrogenase (FwdG), subunit G | 2  | $14 \pm 2$      | ND   |
| MA0676 | biotin operon repressor/biotin-pyruvate carboxylase ligase  |    | ND              | 0.33 |
| MA0685 | sulfite reductase                                           |    | ND              | 0.15 |
| MA0705 | aldehyde dehydrogenase                                      |    | ND              | 0.23 |
| MA0706 | predicted protein                                           |    | ND              | 0.13 |
| MA0709 | conserved hypothetical protein                              |    | ND              | 2.99 |
| MA0715 | conserved hypothetical protein                              |    | ND              | 0.13 |
| MA0719 | conserved hypothetical protein                              |    | ND              | 2.56 |
| MA0746 | conserved hypothetical protein                              |    | ND              | 4.25 |
| MA0791 | hypothetical protein                                        |    | ND              | 2.56 |
| MA0792 | arginine deiminase                                          |    | ND              | 3.35 |
| MA0808 | homocysteine desulfhydrase                                  |    | ND              | 0.39 |
| MA0814 | predicted protein                                           | 7  | $0.18 \pm 0.04$ | ND   |
| MA0821 | conserved hypothetical protein                              |    | ND              | 0.29 |
| MA0827 | predicted protein                                           | 5  | $5 \pm 1$       | 3.80 |
| MA0834 | formylmethanofuran dehydrogenase, subunit B                 |    | ND              | 0.32 |
| MA0835 | formylmethanofuran dehydrogenase, subunit D                 |    | ND              | 5.53 |
| MA0840 | dipeptide ABC transporter, solute-binding protein           |    | ND              | 2.92 |
| MA0859 | hypothetical protein (multi-domain)                         |    | ND              | 3.68 |
| MA0872 | cobN/magnesium chelatase family protein                     | 6  | $0.14 \pm 0.05$ | 0.31 |
| MA0873 | PQQ enzyme repeat domain protein                            | 10 | $0.12 \pm 0.03$ | ND   |
| MA0875 | predicted protein                                           |    | ND              | 0.30 |
| MA0880 | dipeptide ABC transporter, dipeptide-binding protein        |    | ND              | 0.32 |
| MA0882 | magnesium chelatase subunit                                 | 9  | $20 \pm 10$     | ND   |
| MA0904 | predicted protein                                           | 4  | $5.1 \pm 0.4$   | 4.99 |
| MA0913 | imidazoleglycerol-phosphate synthase, subunit H             | 3  | $8 \pm 3$       | ND   |
| MA0923 | ribosomal protein S8e                                       | 3  | $8 \pm 4$       | 3.91 |
| MA0936 | conserved hypothetical protein                              |    | ND              | 2.88 |
| MA0937 | ABC transporter, ATP-binding protein                        |    | ND              | 2.89 |
| MA0940 | conserved hypothetical protein                              | 2  | $4 \pm 1$       | ND   |
| MA0942 | histidinol-phosphate aminotransferase                       |    | ND              | 3.48 |

|        |                                                   |   |             |      |
|--------|---------------------------------------------------|---|-------------|------|
| MA0943 | histidyl-tR synthetase                            |   | ND          | 2.86 |
| MA0949 | ribosomal protein S15p                            | 4 | 5 ± 1       | 3.30 |
| MA0950 | ferric enterobactin transport ATP-binding protein | 4 | 14 ± 4      | ND   |
| MA0957 | hypothetical protein (multi-domain)               |   | ND          | 0.26 |
| MA0958 | conserved hypothetical protein                    | 5 | 5 ± 1       | ND   |
| MA0968 | eif5A-deoxyhypusine synthase                      |   | ND          | 0.37 |
| MA0985 | predicted protein                                 |   | ND          | 0.37 |
| MA0991 | predicted protein                                 |   | ND          | 0.32 |
| MA1017 | conserved hypothetical protein                    |   | ND          | 0.38 |
| MA1030 | NAD <sup>+</sup> synthase (glutamine-hydrolyzing) | 5 | 0.1 ± 0.05  | ND   |
| MA1032 | serine O-acetyltransferase                        | 4 | 0.27 ± 0.05 | ND   |
| MA1033 | predicted protein                                 |   | ND          | 0.25 |
| MA1050 | transposase                                       |   | ND          | 0.20 |
| MA1072 | ribosomal protein L3p                             | 8 | 10 ± 6      | ND   |
| MA1073 | ribosomal protein L4                              | 6 | 6 ± 2       | ND   |
| MA1074 | ribosomal protein L23p                            | 2 | 6 ± 1       | 0.12 |
| MA1075 | ribosomal protein L2p                             | 3 | 6.1 ± 0.7   | 3.43 |
| MA1076 | ribosomal protein S19p                            | 5 | 7 ± 3       | ND   |
| MA1077 | ribosomal protein L22p                            | 3 | 6 ± 2       | ND   |
| MA1078 | ribosomal protein S3p                             | 6 | 5 ± 2       | 4.30 |
| MA1079 | ribosomal protein L29p                            | 3 | 4.8 ± 0.2   | ND   |
| MA1081 | ribosomal protein S17p                            | 2 | 4.4 ± 0.5   | 3.52 |
| MA1082 | ribosomal protein L14p                            | 2 | 6 ± 1       | 3.36 |
| MA1083 | ribosomal protein L24p                            | 5 | 5 ± 2       | ND   |
| MA1084 | ribosomal protein S4e                             | 6 | 7 ± 3       | 4.10 |
| MA1085 | ribosomal protein L5p                             | 4 | 5 ± 1       | 3.85 |
| MA1087 | ribosomal protein S8                              | 3 | 4.1 ± 0.4   | ND   |
| MA1088 | ribosomal protein L6p                             | 4 | 6 ± 1       | 5.57 |
| MA1089 | ribosomal protein L32e                            | 4 | 4.9 ± 0.8   | 5.22 |
| MA1090 | ribosomal protein L19e                            | 2 | 5 ± 2       | 4.42 |
| MA1091 | ribosomal protein L18p                            | 5 | 7 ± 3       | 2.98 |
| MA1092 | ribosomal protein S5                              | 3 | 4 ± 1       | 3.15 |
| MA1093 | ribosomal protein L30p                            |   | ND          | 3.19 |
| MA1094 | ribosomal protein L15p                            | 3 | 5 ± 1       | ND   |
| MA1108 | ribosomal protein S13p                            | 3 | 7 ± 1       | ND   |
| MA1109 | ribosomal protein S4p                             | 9 | 5 ± 1       | 4.41 |
| MA1110 | ribosomal protein S11p                            | 6 | 6 ± 2       | 3.76 |
| MA1111 | NAD-directed R polymerase, subunit D              | 2 | 3.9 ± 0.5   | ND   |
| MA1112 | NAD-directed R polymerase, subunit D              | 2 | 4.5 ± 0.7   | ND   |
| MA1130 | iron ABC transporter, solute-binding protein      | 5 | 28 ± 6      | ND   |
| MA1138 | hydrogenase expression/formation protein          |   | ND          | 2.55 |
| MA1141 | F <sub>420</sub> -nonreducing hydrogenase         |   | ND          | 6.32 |
| MA1173 | GDP-mannose 4,6-dehydratase                       |   | ND          | 2.92 |
| MA1174 | GDP-mannose 4,6-dehydratase                       |   | ND          | 2.84 |
| MA1185 | UDP-glucose 4-epimerase                           |   | ND          | 3.66 |
| MA1231 | iron(III) ABC transporter, solute-binding protein |   | ND          | 0.08 |
| MA1255 | ribosomal protein S10p                            | 4 | 4.3 ± 0.4   | 3.23 |

|        |                                                             |    |             |       |
|--------|-------------------------------------------------------------|----|-------------|-------|
| MA1256 | translation elongation factor 1, subunit alpha              |    | ND          | 4.10  |
| MA1257 | translation elongation factor 2                             | 12 | 5 ± 2       | ND    |
| MA1258 | ribosomal protein S7p                                       | 9  | 6 ± 2       | 3.92  |
| MA1260 | transcription termination factor NusA                       | 4  | 4.8 ± 0.8   | ND    |
| MA1261 | ribosomal protein L30e                                      | 2  | 5 ± 2       | 4.73  |
| MA1262 | NAD-directed R polymerase, subunit D                        |    | ND          | 0.07  |
| MA1265 | NAD-directed R polymerase, subunit B                        |    | ND          | 37.00 |
| MA1278 | conserved hypothetical protein                              |    | ND          | 2.72  |
| MA1279 | conserved hypothetical protein                              |    | ND          | 3.43  |
| MA1288 | 23S R methyltransferase J                                   |    | ND          | 2.53  |
| MA1303 | predicted protein                                           |    | ND          | 10.99 |
| MA1310 | predicted protein                                           |    | ND          | 6.87  |
| MA1316 | sodium:proline symporter (proline permease)                 |    | ND          | 0.31  |
| MA1339 | conserved hypothetical protein                              |    | ND          | 0.31  |
| MA1341 | FMN-binding protein                                         | 5  | 12 ± 2      | ND    |
| MA1342 | P-type copper-transporting ATPase                           | 7  | 5 ± 1       | ND    |
| MA1343 | predicted protein                                           |    | ND          | 0.14  |
| MA1364 | O-linked N-acetylglucosamine transferase                    |    | ND          | 0.05  |
| MA1384 | 6-phospho-3-hexuloisomerase                                 |    | ND          | 2.93  |
| MA1395 | transcriptional regulator, CopG family                      | 4  | 6 ± 2       | 0.24  |
| MA1405 | predicted protein                                           |    | ND          | 2.64  |
| MA1418 | hypothetical protein                                        |    | ND          | 3.15  |
| MA1421 | predicted protein                                           |    | ND          | 0.33  |
| MA1423 | conserved hypothetical protein                              | 3  | 12 ± 3      | ND    |
| MA1432 | hypothetical protein (multi-domain)                         |    | ND          | 0.19  |
| MA1439 | NAD <sup>+</sup> pyrophosphatase                            |    | ND          | 0.18  |
| MA1446 | ribosomal protein L21e                                      | 2  | 5 ± 1       | ND    |
| MA1448 | conserved hypothetical protein                              | 2  | 16 ± 2      | ND    |
| MA1454 | cell surface lipoprotein                                    | 2  | 0.17 ± 0.01 | ND    |
| MA1456 | predicted protein                                           | 5  | 4.1 ± 0.4   | 3.54  |
| MA1457 | conserved hypothetical protein                              |    | ND          | 2.92  |
| MA1462 | universal stress protein                                    | 5  | 4.4 ± 0.7   | ND    |
| MA1465 | predicted protein                                           |    | ND          | 0.09  |
| MA1471 | translation elongation factor 1, subunit beta               |    | ND          | 3.00  |
| MA1484 | geranylgeranyl reductase                                    | 6  | 5.4 ± 0.9   | ND    |
| MA1486 | MoaA/NifB/PqqE family protein                               |    | ND          | 2.72  |
| MA1488 | conserved hypothetical protein                              |    | ND          | 2.69  |
| MA1489 | conserved hypothetical protein                              | 3  | 20 ± 10     | ND    |
| MA1490 | conserved hypothetical protein                              |    | ND          | 3.13  |
| MA1494 | predicted protein                                           |    | ND          | 3.76  |
| MA1495 | F <sub>420</sub> H <sub>2</sub> dehydrogenase, subunit FpoA |    | ND          | 8.75  |
| MA1496 | F <sub>420</sub> H <sub>2</sub> dehydrogenase, subunit FpoB |    | ND          | 6.87  |
| MA1498 | F <sub>420</sub> H <sub>2</sub> dehydrogenase, subunit FpoD | 4  | 15 ± 4      | ND    |
| MA1499 | F <sub>420</sub> H <sub>2</sub> dehydrogenase, subunit FpoH | 3  | 26 ± 1      | 2.97  |
| MA1500 | F <sub>420</sub> H <sub>2</sub> dehydrogenase, subunit FpoI |    | ND          | 4.98  |
| MA1501 | F <sub>420</sub> H <sub>2</sub> dehydrogenase, subunit FpoJ |    | ND          | 6.40  |
| MA1502 | F <sub>420</sub> H <sub>2</sub> dehydrogenase, subunit FpoJ |    | ND          | 6.75  |

|        |                                                             |    |             |      |
|--------|-------------------------------------------------------------|----|-------------|------|
| MA1503 | F <sub>420</sub> H <sub>2</sub> dehydrogenase, subunit FpoK |    | ND          | 7.08 |
| MA1504 | F <sub>420</sub> H <sub>2</sub> dehydrogenase, subunit FpoL |    | ND          | 5.33 |
| MA1506 | F <sub>420</sub> H <sub>2</sub> dehydrogenase, subunit FpoN |    | ND          | 0.14 |
| MA1521 | ribosomal protein L7ae                                      | 4  | 5.2 ± 0.7   | 7.80 |
| MA1524 | nucleoside-diphosphate kinase                               | 3  | 6 ± 2       | 5.79 |
| MA1525 | translation initiation factor If2                           | 4  | 5 ± 2       | 5.08 |
| MA1526 | ribosomal protein S6e                                       | 4  | 5 ± 0.7     | 3.36 |
| MA1560 | predicted protein                                           |    | ND          | 3.40 |
| MA1568 | predicted protein                                           |    | ND          | 0.06 |
| MA1569 | Pap2 superfamily protein                                    | 2  | 12 ± 2      | ND   |
| MA1574 | superoxide dismutase                                        |    | ND          | 0.14 |
| MA1615 | methylcobamide:CoM methyltransferase isozyme M              |    | ND          | 0.20 |
| MA1654 | intracellular protease                                      | 3  | 0.19 ± 0.05 | ND   |
| MA1662 | predicted protein                                           |    | ND          | 0.04 |
| MA1666 | integral membrane protein                                   |    | ND          | 0.31 |
| MA1671 | conserved hypothetical protein                              |    | ND          | 7.88 |
| MA1676 | predicted protein                                           | 2  | 4 ± 1       | ND   |
| MA1684 | aspartyl-tR synthetase                                      | 10 | 4 ± 1       | 4.51 |
| MA1685 | unknown                                                     |    | ND          | 0.34 |
| MA1710 | methenyltetrahydromethanopterin cyclohydrolase              |    | ND          | 5.64 |
| MA1714 | aldehyde ferredoxin oxidoreductase                          |    | ND          | 0.17 |
| MA1737 | predicted protein                                           |    | ND          | 0.26 |
| MA1744 | conserved hypothetical protein                              | 2  | 9 ± 3       | ND   |
| MA1748 | cobalt ABC transporter, permease protein                    |    | ND          | 0.21 |
| MA1754 | cell surface protein                                        |    | ND          | 0.23 |
| MA1756 | cell surface protein                                        |    | ND          | 0.27 |
| MA1758 | hypothetical protein (multi-domain)                         |    | ND          | 0.18 |
| MA1760 | hypothetical protein (multi-domain)                         |    | ND          | 0.20 |
| MA1764 | cell surface protein                                        |    | ND          | 0.12 |
| MA1775 | ribosomal protein L37ae                                     | 2  | 4.4 ± 0.5   | ND   |
| MA1776 | tR nucleotidyltransferase                                   |    | ND          | 2.77 |
| MA1784 | ribosomal protein L15e                                      | 3  | 6.6 ± 0.8   | ND   |
| MA1794 | metallo-beta-lactamase                                      |    | ND          | 0.39 |
| MA1795 | predicted protein                                           |    | ND          | 2.60 |
| MA1798 | predicted protein                                           |    | ND          | 0.20 |
| MA1816 | aspartate aminotransferase                                  |    | ND          | 3.11 |
| MA1817 | riboflavin synthase, subunit alpha                          |    | ND          | 2.90 |
| MA1820 | glycerol-3-phosphate cytidyltransferase                     |    | ND          | 0.32 |
| MA1821 | conserved hypothetical protein                              | 4  | 4.8 ± 0.7   | ND   |
| MA1826 | conserved hypothetical protein                              |    | ND          | 3.06 |
| MA1835 | conserved hypothetical protein                              |    | ND          | 0.28 |
| MA1837 | predicted protein                                           |    | ND          | 3.26 |
| MA1848 | UbiE/COQ5 methyltransferase                                 | 3  | 0.08 ± 0.05 | ND   |
| MA1897 | predicted protein                                           |    | ND          | 0.25 |
| MA1901 | alcohol dehydrogenase ( NADP <sup>+</sup> )                 |    | ND          | 0.19 |
| MA1909 | hypothetical protein                                        | 3  | 20 ± 10     | ND   |
| MA1937 | carbon-nitrogen hydrolase                                   |    | ND          | 4.11 |

|        |                                                                     |    |                          |       |
|--------|---------------------------------------------------------------------|----|--------------------------|-------|
| MA1940 | predicted protein                                                   | 2  | 0.15 ± 0.03              | 0.08  |
| MA1981 | conserved hypothetical protein                                      |    | ND                       | 3.85  |
| MA1998 | predicted protein                                                   | 4  | 0.26 ± 0.07              | 0.14  |
| MA2003 | sodium-dependent transporter                                        |    | ND                       | 0.28  |
| MA2004 | FtsJ-like methyltransferase                                         | 3  | 6.6 ± 0.4                | ND    |
| MA2039 | predicted protein                                                   |    | ND                       | 3.13  |
| MA2044 | predicted protein                                                   |    | ND                       | 3.46  |
| MA2046 | conserved hypothetical protein                                      |    | ND                       | 2.98  |
| MA2059 | 4-carboxymuconolactone decarboxylase                                |    | ND                       | 0.13  |
| MA2084 | cob(I)alamin adenosyltransferase                                    |    | ND                       | 0.37  |
| MA2097 | predicted protein                                                   |    | ND                       | 2.76  |
| MA2143 | carbamoyl-phosphate synthase (glutamine-hydrolyzing), large subunit | 11 | 5 ± 2                    | 2.88  |
| MA2144 | carbamoyl-phosphate synthase (glutamine-hydrolyzing), small subunit | 7  | 5 ± 2                    | ND    |
| MA2145 | glycine betaine/L-proline ABC transporter, ATP-binding protein      |    | 5 ± 1                    | ND    |
| MA2149 | Fe(III) dicitrate ABC transporter, permease                         |    | ND                       | 0.37  |
| MA2161 | conserved hypothetical protein                                      |    | ND                       | 3.97  |
| MA2229 | predicted protein                                                   |    | ND                       | 3.61  |
| MA2252 | conserved hypothetical protein                                      |    | ND                       | 0.002 |
| MA2273 | predicted protein                                                   |    | ND                       | 0.29  |
| MA2298 | predicted protein                                                   |    | ND                       | 0.23  |
| MA2299 | predicted protein                                                   |    | ND                       | 0.28  |
| MA2320 | metallo-beta-lactamase                                              |    | ND                       | 0.32  |
| MA2334 | predicted protein                                                   |    | ND                       | 0.11  |
| MA2349 | phosphate-binding protein                                           |    | ND                       | 0.38  |
| MA2373 | predicted protein                                                   |    | ND                       | 3.42  |
| MA2375 | arylsulfatase                                                       |    | ND                       | 0.19  |
| MA2389 | conserved hypothetical protein                                      |    | ND                       | 0.22  |
| MA2390 | predicted protein                                                   |    | ND                       | 0.03  |
| MA2392 | predicted protein                                                   |    | ND                       | 0.13  |
| MA2410 | formate acetyltransferase activating enzyme                         |    | ND                       | 0.33  |
| MA2427 | conserved hypothetical protein                                      |    | ND                       | 0.12  |
| MA2441 | H <sup>+</sup> -transporting ATP synthase, subunit beta             |    | ND                       | 0.31  |
| MA2456 | predicted protein                                                   | 2  | 0.06 ± 0.02              | ND    |
| MA2510 | DNA topoisomerase, type I                                           | 4  | 3.9 ± 0.6                | ND    |
| MA2522 | predicted protein                                                   |    | ND                       | 0.15  |
| MA2536 | carbonic anhydrase (Cam)                                            | 2  | 0.11 ± 0.03 <sup>c</sup> | ND    |
| MA2574 | hypothetical protein (multi-domain)                                 |    | ND                       | 0.32  |
| MA2589 | predicted protein                                                   |    | ND                       | 2.61  |
| MA2595 | predicted protein                                                   |    | ND                       | 0.27  |
| MA2615 | conserved hypothetical protein                                      | 4  | 15 ± 4                   | ND    |
| MA2628 | glycogen debranching enzyme                                         |    | ND                       | 3.09  |
| MA2636 | conserved hypothetical protein                                      | 2  | 0.1 ± 0.06               | ND    |
| MA2655 | MuT/NUDIX protein                                                   |    | ND                       | 0.30  |
| MA2678 | predicted protein                                                   |    | ND                       | 0.22  |

|        |                                                      |   |             |       |
|--------|------------------------------------------------------|---|-------------|-------|
| MA2711 | conserved hypothetical protein                       | 5 | 0.2 ± 0.1   | ND    |
| MA2717 | NifU protein                                         | 2 | 7 ± 1       | ND    |
| MA2719 | conserved hypothetical protein                       |   | ND          | 0.40  |
| MA2792 | predicted protein                                    |   | ND          | 0.33  |
| MA2813 | peptidylprolyl isomerase                             |   | ND          | 3.25  |
| MA2819 | conserved hypothetical protein                       | 2 | 0.18 ± 0.03 | ND    |
| MA2846 | conserved hypothetical protein                       |   | ND          | 0.31  |
| MA2868 | heterodisulfide reductase (HdrA), subunit A          | 4 | 0.2 ± 0.1   | ND    |
| MA2896 | threonyl-tR synthetase                               | 3 | 4.1 ± 0.8   | 2.53  |
| MA2912 | AMP-binding protein                                  | 4 | 8 ± 4       | ND    |
| MA2923 | conserved hypothetical protein                       | 6 | 0.09 ± 0.01 | 0.09  |
| MA2933 | conserved hypothetical protein                       |   | ND          | 0.10  |
| MA2971 | monomethylamine corrinoid protein                    |   | ND          | 3.99  |
| MA2978 | predicted protein                                    |   | ND          | 0.23  |
| MA2982 | predicted protein                                    | 5 | 0.12 ± 0.04 | ND    |
| MA2984 | predicted protein                                    |   | ND          | 0.03  |
| MA2985 | predicted protein                                    |   | ND          | 0.15  |
| MA2986 | anthranilate synthase, component II                  |   | ND          | 2.52  |
| MA2989 | anthranilate phosphoribosyltransferase               |   | ND          | 6.33  |
| MA2990 | tryptophan synthase, subunit alpha                   |   | ND          | 10.46 |
| MA2991 | tryptophan synthase, subunit beta                    |   | ND          | 4.16  |
| MA2992 | indole-3-glycerol-phosphate synthase                 |   | ND          | 6.29  |
| MA3006 | formaldehyde-activating enzyme                       |   | ND          | 2.64  |
| MA3008 | phosphoglycerate mutase family protein               |   | ND          | 3.03  |
| MA3026 | predicted protein                                    |   | ND          | 0.38  |
| MA3034 | uroporphyrinogen-III synthase                        | 3 | 3.6 ± 0.6   | ND    |
| MA3035 | coenzyme PQQ synthesis protein E                     | 4 | 6 ± 2       | ND    |
| MA3045 | predicted protein                                    |   | ND          | 0.39  |
| MA3048 | oligopeptide ABC transporter, solute-binding protein |   | ND          | 3.26  |
| MA3052 | valyl-tR synthetase                                  |   | ND          | 3.48  |
| MA3067 | chemotaxis protein-glutamate methylesterase          |   | ND          | 0.35  |
| MA3075 | 2-oxoacid ferredoxin oxidoreductase, subunit alpha   |   | ND          | 0.32  |
| MA3092 | conserved hypothetical protein                       | 3 | 0.09 ± 0.01 | ND    |
| MA3113 | predicted protein                                    |   | ND          | 0.33  |
| MA3133 | cell surface protein                                 |   | ND          | 0.40  |
| MA3140 | mannose-1-phosphate guanylyltransferase (GDP)        |   | ND          | 3.14  |
| MA3141 | predicted protein                                    |   | ND          | 2.74  |
| MA3152 | carboxymuconolactone decarboxylase                   |   | ND          | 0.27  |
| MA3165 | hypothetical protein                                 | 4 | 0.2 ± 0.1   | ND    |
| MA3169 | glutamate dehydrogenase ( NAD(P)H <sup>+</sup> )     |   | ND          | 0.25  |
| MA3186 | predicted protein                                    |   | ND          | 0.07  |
| MA3213 | predicted protein                                    |   | ND          | 0.18  |
| MA3250 | cobyric acid synthase                                | 5 | 9 ± 3       | ND    |
| MA3252 | ornithine cyclodeaminase                             |   | ND          | 0.18  |
| MA3260 | O-Glc c transferase, p110 subunit                    | 9 | 12 ± 9      | ND    |
| MA3261 | FxsA protein                                         |   | ND          | 0.33  |
| MA3264 | cysteine desulphurase                                |   | ND          | 0.27  |



|        |                                                            |    |                          |       |
|--------|------------------------------------------------------------|----|--------------------------|-------|
| MA3280 | predicted protein                                          |    | ND                       | 0.24  |
| MA3289 | endopeptidase La                                           | 10 | 11 ± 5                   | ND    |
| MA3300 | predicted protein                                          |    | ND                       | 0.38  |
| MA3302 | conserved hypothetical protein                             | 5  | 0.004 ± 0.002            | ND    |
| MA3307 | orotate phosphoribosyltransferase                          | 5  | 6 ± 2                    | ND    |
| MA3315 | predicted protein                                          |    | ND                       | 0.20  |
| MA3317 | arylsulfatase regulator                                    | 4  | 0.12 ± 0.01              | ND    |
| MA3322 | conserved hypothetical protein                             | 3  | 20 ± 10                  | ND    |
| MA3334 | conserved hypothetical protein                             | 2  | 0.07 ± 0.01              | ND    |
| MA3342 | 2-isopropylmalate synthase                                 | 3  | 5 ± 1                    | ND    |
| MA3343 | conserved hypothetical protein                             |    | ND                       | 0.38  |
| MA3345 | glyceraldehyde 3-phosphate dehydrogenase (phosphorylating) |    | ND                       | 0.25  |
| MA3378 | predicted protein                                          | 2  | 3.3 ± 0.2                | ND    |
| MA3382 | glutamate-ammonia ligase                                   | 7  | 4 ± 1                    | 24.17 |
| MA3387 | predicted protein                                          |    | ND                       | 2.73  |
| MA3408 | pyruvate water dikinase                                    |    | ND                       | 0.16  |
| MA3416 | ribosomal protein S3Ae                                     | 3  | 5 ± 1                    | 6.13  |
| MA3418 | conserved hypothetical protein                             | 3  | 6 ± 3                    | ND    |
| MA3439 | sulfite reductase, beta subunit                            | 4  | 12 ± 4                   | 5.36  |
| MA3449 | conserved hypothetical protein                             | 2  | 40 ± 30                  | ND    |
| MA3454 | conserved hypothetical protein                             |    | ND                       | 3.17  |
| MA3455 | nickel ABC transporter, solute-binding protein             | 3  | 20 ± 10                  | 4.01  |
| MA3467 | methyltransferase                                          |    | ND                       | 0.26  |
| MA3475 | predicted protein                                          | 2  | 8 ± 3                    | ND    |
| MA3476 | predicted protein                                          |    | ND                       | 4.85  |
| MA3477 | ferrous iron transport protein B                           | 8  | 30 ± 10                  | 34.15 |
| MA3482 | MoaA/NifB/PqqE family protein                              |    | ND                       | 0.06  |
| MA3498 | hydantoinase                                               |    | ND                       | 3.66  |
| MA3520 | glycine hydroxymethyltransferase                           |    | ND                       | 3.16  |
| MA3522 | phosphoribosylglycinamide formyltransferase                | 2  | 3.8 ± 0.7                | ND    |
| MA3547 | predicted protein                                          |    | ND                       | 3.13  |
| MA3556 | predicted protein                                          |    | ND                       | 0.17  |
| MA3562 | glucokinase                                                |    | ND                       | 0.28  |
| MA3568 | predicted protein                                          |    | ND                       | 0.11  |
| MA3569 | predicted protein                                          |    | ND                       | 0.08  |
| MA3576 | predicted protein                                          | 2  | 4 ± 0                    | ND    |
| MA3606 | acetate kinase                                             | 8  | 0.02 ± 0.01 <sup>c</sup> | 0.05  |
| MA3607 | phosphotransacetylase                                      | 9  | 0.06 ± 0.03 <sup>c</sup> | 0.09  |
| MA3631 | cobalamin biosynthesis protein                             | 3  | 20 ± 7                   | ND    |
| MA3632 | cadmium efflux ATPase                                      |    | ND                       | 2.96  |
| MA3661 | predicted protein                                          | 2  | 240 ± 90                 | ND    |
| MA3667 | conserved hypothetical                                     | 4  | 0.02 ± 0.01              | ND    |
| MA3679 | predicted protein                                          |    | ND                       | 0.23  |
| MA3684 | conserved hypothetical protein                             |    | ND                       | 0.37  |
| MA3689 | conserved hypothetical protein                             | 5  | 4 ± 0.8                  | ND    |
| MA3694 | conserved hypothetical protein                             |    | ND                       | 3.86  |

|        |                                                                                                          |    |                          |      |
|--------|----------------------------------------------------------------------------------------------------------|----|--------------------------|------|
| MA3695 | ribosomal protein S24e                                                                                   | 4  | 6 ± 1                    | ND   |
| MA3705 | O-sialoglycoprotein endopeptidase                                                                        |    | ND                       | 2.62 |
| MA3731 | cytidyltransferase                                                                                       |    | ND                       | 2.88 |
| MA3732 | F <sub>420</sub> H <sub>2</sub> dehydrogenase, subunit FpoF                                              | 5  | 4.2 ± 0.8                | ND   |
| MA3733 | F <sub>420</sub> -dependent N <sup>5</sup> ,N <sup>10</sup> -methylene-tetrahydromethanopterin reductase | 11 | 9 ± 4                    | 7.11 |
| MA3751 | 3-isopropylmalate dehydratase                                                                            |    | ND                       | 4.66 |
| MA3762 | predicted protein                                                                                        |    | ND                       | 0.24 |
| MA3785 | predicted protein                                                                                        |    | ND                       | 0.03 |
| MA3786 | dihydroorotate dehydrogenase, electron transfer subunit                                                  |    | ND                       | 2.57 |
| MA3869 | conserved hypothetical protein                                                                           |    | ND                       | 2.74 |
| MA3886 | prolyl-tR synthetase                                                                                     |    | ND                       | 2.58 |
| MA3915 | UbiE/COQ5 methyltransferase                                                                              | 3  | 7 ± 2                    | ND   |
| MA3917 | ammonium transporter                                                                                     |    | ND                       | 5.92 |
| MA3918 | ammonium transporter                                                                                     |    | ND                       | 4.09 |
| MA3921 | hemin ABC transporter, permease protein                                                                  |    | ND                       | 2.93 |
| MA3956 | ATP-dependent R helicase                                                                                 | 5  | 20 ± 10                  | ND   |
| MA3961 | predicted protein                                                                                        | 2  | 0.05 ± 0.01              | ND   |
| MA3967 | methylcoenzyme M reductase system, component A2                                                          |    | ND                       | 0.12 |
| MA3969 | PcrB family protein                                                                                      |    | ND                       | 2.74 |
| MA3980 | predicted protein                                                                                        |    | ND                       | 0.07 |
| MA3990 | MutT related protein                                                                                     |    | ND                       | 0.34 |
| MA4017 | conserved hypothetical protein                                                                           |    | ND                       | 0.07 |
| MA4028 | predicted protein                                                                                        |    | ND                       | 0.07 |
| MA4039 | conserved hypothetical protein                                                                           |    | ND                       | 0.30 |
| MA4040 | conserved hypothetical protein                                                                           | 5  | 7 ± 2                    | 3.75 |
| MA4041 | acyl carrier protein synthase                                                                            | 4  | 17 ± 4                   | ND   |
| MA4042 | acetyl-CoA C-acyltransferase                                                                             | 6  | 12 ± 5                   | 2.53 |
| MA4044 | adenylate cyclase                                                                                        | 4  | 6 ± 1                    | ND   |
| MA4047 | proteinase IV                                                                                            | 2  | 4 ± 1                    | ND   |
| MA4048 | seryl-tR synthetase                                                                                      | 4  | 5 ± 2                    | ND   |
| MA4058 | predicted protein                                                                                        |    | ND                       | 0.27 |
| MA4080 | predicted protein                                                                                        |    | ND                       | 0.07 |
| MA4081 | conserved hypothetical protein                                                                           |    | ND                       | 2.58 |
| MA4096 | predicted protein                                                                                        |    | ND                       | 0.40 |
| MA4101 | glutamate 5-kinase                                                                                       |    | ND                       | 3.19 |
| MA4110 | prefoldin, subunit alpha                                                                                 |    | ND                       | 2.58 |
| MA4111 | ribosomal protein LX                                                                                     | 2  | 5 ± 2                    | ND   |
| MA4112 | translation initiation factor 6                                                                          | 3  | 5.3 ± 0.9                | 3.21 |
| MA4113 | ribosomal protein L31e                                                                                   | 2  | 6 ± 2                    | 3.81 |
| MA4116 | conserved hypothetical protein                                                                           |    | ND                       | 4.13 |
| MA4117 | ribosomal protein S19e                                                                                   | 5  | 6 ± 2                    | 3.72 |
| MA4118 | adenylosuccinate synthase                                                                                | 6  | 5 ± 1                    | 4.34 |
| MA4142 | predicted protein                                                                                        | 2  | 0.14 ± 0.05              | ND   |
| MA4147 | metallo-beta-lactamase family protein                                                                    |    | ND                       | 0.31 |
| MA4152 | H <sup>+</sup> -transporting ATP synthase, (AtpH) subunit H                                              | 2  | 0.32 ± 0.1 <sup>c</sup>  | ND   |
| MA4153 | H <sup>+</sup> -transporting ATP synthase, (AtpI) subunit I                                              | 8  | 0.10 ± 0.05 <sup>c</sup> | 6.16 |

|        |                                                             |    |                          |       |
|--------|-------------------------------------------------------------|----|--------------------------|-------|
| MA4154 | H <sup>+</sup> -transporting ATP synthase, (AtpC) subunit C | 2  | 0.08 ± 0.03 <sup>c</sup> | ND    |
| MA4155 | H <sup>+</sup> -transporting ATP synthase, (AtpE) subunit E | 7  | 0.13 ± 0.04 <sup>c</sup> | ND    |
| MA4156 | H <sup>+</sup> -transporting ATP synthase, (AtpC) subunit C | 8  | 0.10 ± 0.04 <sup>c</sup> | ND    |
| MA4157 | H <sup>+</sup> -transporting ATP synthase, (AtpF) subunit F | 4  | 0.13 ± 0.04 <sup>c</sup> | ND    |
| MA4158 | H <sup>+</sup> -transporting ATP synthase, (AtpA) subunit A | 15 | 0.12 ± 0.05 <sup>c</sup> | ND    |
| MA4159 | H <sup>+</sup> -transporting ATP synthase, (AtpB) subunit B | 8  | 0.14 ± 0.06 <sup>c</sup> | ND    |
| MA4160 | H <sup>+</sup> -transporting ATP synthase, (AtpD) subunit D | 5  | 0.10 ± 0.03 <sup>c</sup> | 0.27  |
| MA4175 | formylmethanofuran dehydrogenase, subunit A                 | 2  | 0.14 ± 0.05              | 2.79  |
| MA4176 | formylmethanofuran dehydrogenase, subunit C                 | 2  | 0.14 ± 0.05              | 6.34  |
| MA4198 | conserved hypothetical protein                              | 3  | 4.1 ± 0.1                | ND    |
| MA4200 | conserved hypothetical protein                              | 3  | 0.2 ± 0.1                | 0.16  |
| MA4216 | glutamate-ammonia ligase                                    | 6  | 4 ± 1                    | 6.91  |
| MA4217 | conserved hypothetical protein                              |    | ND                       | 16.14 |
| MA4219 | conserved hypothetical protein                              | 4  | 4 ± 1                    | 15.11 |
| MA4221 | predicted protein                                           |    | ND                       | 2.58  |
| MA4240 | conserved hypothetical protein                              |    | ND                       | 0.38  |
| MA4244 | conserved hypothetical protein                              | 4  | 50 ± 20                  | ND    |
| MA4245 | conserved hypothetical protein                              | 2  | 7.4 ± 0                  | 2.50  |
| MA4246 | nucleotide binding protein                                  | 3  | 5 ± 1                    | ND    |
| MA4258 | precorrin-8X methylmutase                                   | 5  | 6 ± 1                    | ND    |
| MA4259 | precorrin-3B C17-methyltransferase                          | 3  | 8 ± 4                    | ND    |
| MA4268 | proteasome-activating nucleotidase                          | 3  | 4 ± 1                    | 0.27  |
| MA4274 | ribosomal protein L11p                                      | 5  | 5.6 ± 0.9                | ND    |
| MA4275 | ribosomal protein L1p                                       | 4  | 5 ± 2                    | 4.51  |
| MA4276 | acidic ribosomal protein P0 homolog                         | 6  | 6 ± 2                    | 3.62  |
| MA4277 | ribosomal protein L12p                                      | 2  | 5 ± 1                    | ND    |
| MA4281 | predicted protein                                           |    | ND                       | 8.41  |
| MA4318 | conserved hypothetical protein                              |    | ND                       | 0.21  |
| MA4329 | thiamine biosynthesis protein ThiC                          |    | ND                       | 3.48  |
| MA4333 | conserved hypothetical protein                              |    | ND                       | 0.24  |
| MA4367 | 5-amino-6-(5-phosphoribosylamino) uracil reductase          |    | ND                       | 0.19  |
| MA4369 | hydrogenase-3 subunit (EchB homolog)                        |    | ND                       | 2.62  |
| MA4379 | methylcobamide:CoM methyltransferase isozyme M              | 3  | 80 ± 30                  | 29.20 |
| MA4411 | isochorismatase                                             |    | ND                       | 0.31  |
| MA4428 | conserved hypothetical protein                              | 5  | 4.2 ± 0.7                | 5.07  |
| MA4429 | phosphoserine phosphatase                                   |    | ND                       | 4.21  |
| MA4430 | methylene-tetrahydromethanopterin dehydrogenase             | 3  | 33 ± 7                   | 5.16  |
| MA4431 | conserved hypothetical protein                              |    | ND                       | 0.18  |
| MA4432 | conserved hypothetical protein                              |    | ND                       | 0.37  |
| MA4436 | conserved hypothetical protein                              | 4  | 5 ± 1                    | ND    |
| MA4451 | predicted protein                                           |    | ND                       | 0.37  |
| MA4459 | UTP-glucose-1-phosphate uridylyltransferase                 | 5  | 4.3 ± 0.8                | ND    |
| MA4472 | ribosomal protein S17e                                      | 2  | 7 ± 3                    | ND    |
| MA4477 | predicted protein                                           |    | ND                       | 5.74  |
| MA4509 | predicted protein                                           |    | ND                       | 0.26  |
| MA4513 | conserved hypothetical protein                              |    | ND                       | 2.72  |
| MA4515 | acetylglutamate kinase                                      |    | ND                       | 3.67  |

|                     |                                                                                        |   |                          |      |
|---------------------|----------------------------------------------------------------------------------------|---|--------------------------|------|
| MA4517              | conserved hypothetical protein                                                         |   | ND                       | 4.63 |
| MA4520              | coenzyme F <sub>420</sub> -dependent oxidoreductase                                    |   | ND                       | 4.56 |
| MA4547              | Methyl coenzyme M reductase (McrG), gamma subunit                                      | 5 | 0.31 ± 0.1 <sup>c</sup>  | ND   |
| MA4550              | Methyl coenzyme M reductase (McrB), beta subunit                                       | 7 | 0.29 ± 0.09 <sup>c</sup> | 6.04 |
| MA4591              | deoxyribose-phosphate aldolase                                                         | 3 | 5 ± 2                    | 4.21 |
| MA4592 <sup>c</sup> | conserved hypothetical protein                                                         | 4 | 5 ± 1                    | 4.36 |
| MA4593              | 3-dehydroquinate dehydratase                                                           |   | ND                       | 3.66 |
| MA4608              | D-arabino 3-hexulose 6-phosphate formaldehyde lyase                                    |   | ND                       | 2.97 |
| MA4615              | 2-isopropylmalate synthase                                                             |   | ND                       | 8.50 |
| MA4631              | D-lactate dehydrogenase                                                                |   | ND                       | 3.86 |
| MA4634              | conserved hypothetical protein                                                         |   | ND                       | 0.01 |
| MA4636              | NADH dehydrogenase                                                                     |   | ND                       | 0.12 |
| MA4638              | conserved hypothetical protein                                                         |   | ND                       | 0.30 |
| MA4640              | conserved hypothetical protein                                                         |   | ND                       | 8.37 |
| MA4665              | multiple resistance/pH regulation related protein B (Na <sup>+</sup> /H <sup>+</sup> ) |   | ND                       | 0.13 |
| MA4673              | nickel ABC transporter, permease protein                                               |   | ND                       | 2.61 |

<sup>a</sup>Annotations are the annotations listed at <http://www.tigr.org>.

<sup>b</sup>Ac, acetate-grown cells; Me, methanol-grown cells.

<sup>c</sup>Reported previously<sup>30</sup>.

<sup>d</sup>P values were ≤0.04 (95% confidence).

ND, Not determined.
